# Supplementary material
Source: Royal Society of Chemistry journal article supplement (doi:10.1039/d6cc01499b)
Supplement: d6cc01499b1.pdf [file d6cc01499b1.pdf]

## Supporting Information

### **Achieving ultrahigh synaptic potentiation with a two-terminal device based on a solution processed Cs<sub>3</sub>Bi<sub>2</sub>Br<sub>9</sub>-MoS<sub>2</sub> hybrid**

Xiaoyu Zhang,<sup>a</sup> Jian Wang,<sup>a</sup> Yanjun Liang,<sup>a</sup> Lu Jiang,<sup>a</sup> Zhiwei Yang,<sup>a</sup>

Jian Zhang\*<sup>a</sup> and Xiao Huang\*<sup>a</sup>

<sup>a</sup> *Institute of Advanced Materials (IAM), Nanjing Tech University (NanjingTech),  
30 South Puzhu Road, Nanjing 211816, China.*

*E-mail: iamjzhang@njtech.edu.cn, iamxhuang@njtech.edu.cn*

## Experimental Section

### 1. Experimental Materials

Cesium bromide (CsBr, purity 99.0%, Sigma Aldrich), bismuth bromide (BiBr<sub>3</sub>, purity 99.0%, Aladdin), oleylamine (OLA, purity 80%~90%, Aladdin), oleic acid (OA, analytical grade, Aladdin), dimethyl sulfoxide (DMSO, analytical grade, Yonghua Chemical), molybdenum disulfide (MoS<sub>2</sub>, purity 99.5%, Energy Chemical), isopropyl alcohol (IPA, purity 99%, Aladdin). All reagents were used directly without further purification.

### 2. Synthesis of Cs<sub>3</sub>Bi<sub>2</sub>Br<sub>9</sub> (CBB)

0.3 mmol CsBr and 0.2 mmol BiBr<sub>3</sub> were dissolved in a mixed solvent consisting of 5 mL DMSO, 30  $\mu$ L OLA, and 0.6 mL OA. The mixture was stirred magnetically for 1 h to obtain a clear CBB precursor solution. Using the ligand-assisted reprecipitation method, 0.5 mL of the precursor solution was rapidly injected into 5 mL of IPA antisolvent under vigorous shaking and allowed to react statically for 1 min. Subsequently, the product was collected by centrifugation at 8000 r/min, and the precipitate was dispersed in IPA for subsequent characterizations.

### 3. Synthesis of CBB-MoS<sub>2</sub> Hybrid

MoS<sub>2</sub> nanopowder was dispersed in IPA, exfoliated by ultrasonication, and centrifuged. The supernatant was collected and dried under vacuum to obtain MoS<sub>2</sub> solid. 0.959 mmol of the dried MoS<sub>2</sub> was weighed and re-dispersed into the CBB precursor solution, followed by vigorous stirring for 1 h to ensure thorough mixing of the two components. Then, 0.5 mL of the mixed precursor solution was dropped into 5 mL of IPA. The product was collected by centrifugation, washed, and finally the CBB-MoS<sub>2</sub> hybrid material was obtained.

#### **4. Device Fabrication**

The device adopts a two-terminal structure by using an interdigitated Au electrode (planar bottom-electrode structure). The CBB-MoS<sub>2</sub> hybrid film was deposited onto the interdigitated Au electrode (interdigital spacing: 100 μm) via drop-casting. The CBB-MoS<sub>2</sub> hybrid material and other control samples were drop cast onto commercial interdigitated gold electrodes (substrate dimensions: 10 mm × 20 mm, interdigital spacing: 0.05 mm, substrate material: Al<sub>2</sub>O<sub>3</sub>, purchased from Huizhou Xinwenxiong Trading Co., Ltd.).

#### **5. Characterizations**

The crystal structure and microstructure of the samples were characterized using X-ray diffraction (XRD, Rigaku Smartlab 3KW, Japan, Cu Kα radiation, λ = 1.54 Å), transmission electron microscopy (TEM, JEOL 2100 Plus, Japan), and high-resolution transmission electron microscopy (HRTEM, JEOL 2100F, Japan). Optical properties of the samples were analyzed using a UV-Vis spectrophotometer (UV-Vis, Shimadzu UV-1780, Japan), a photoluminescence spectrometer (PL, Hitachi F-7100, Japan), and a time-resolved photoluminescence spectrometer (TRPL, Edinburgh Instruments FLS-980, UK). The electronic structure characteristics of the samples were characterized using ultraviolet photoelectron spectroscopy (UPS, ThermoFisher Scientific Nexsa, USA) and X-ray photoelectron spectroscopy (XPS, Thermo Fisher Scientific K-Alpha, USA). During optoelectronic performance measurements, the illumination intensity and relative humidity were adjusted using a laser power meter (Sanwa LP10, Japan) and a hygrometer (Anymetre TH21E, China), respectively. Optoelectronic performance tests were completed using an electrochemical workstation (Autolab 86567, Switzerland), a laser source (Thorlabs DC2200, USA), and a semiconductor characterization system (Keithley 4200SCS, USA).

#### **6. Neuromorphic computing simulation (MNIST)**

MNIST handwritten digit recognition was simulated using NeuroSimV3.0 with a fully-connected two-layer multilayer perceptron (MLP) consisting of 400 input neurons, 100 hidden neurons, and 10 output neurons. The  $28 \times 28$  MNIST images were flattened into 400-dimensional input vectors. The network was trained for 35 epochs using [cross-entropy loss] and [SGD/NeuroSim default] settings. The measured  $\Delta$ PSC evolution under light pulses was discretized into 15 conductance states:  $G_1, G_2, \dots, G_{15}$ . The normalized weight was defined as  $\omega = (G - G_{\min}) / (G_{\max} - G_{\min})$ . Signed synaptic weights were implemented using a differential-pair scheme:  $W = (G_p - G_m) / (G_{\max} - G_{\min})$ , where  $G_p$  and  $G_m$  follow the experimentally extracted potentiation and depression trajectories respectively. During training, the gradient sign selects potentiation (increase  $G_p$ /decrease  $G_m$ ) or depression (decrease  $G_p$ /increase  $G_m$ ). Each update corresponds to a one-step transition between adjacent conductance states to reflect the discrete nature of device programming.

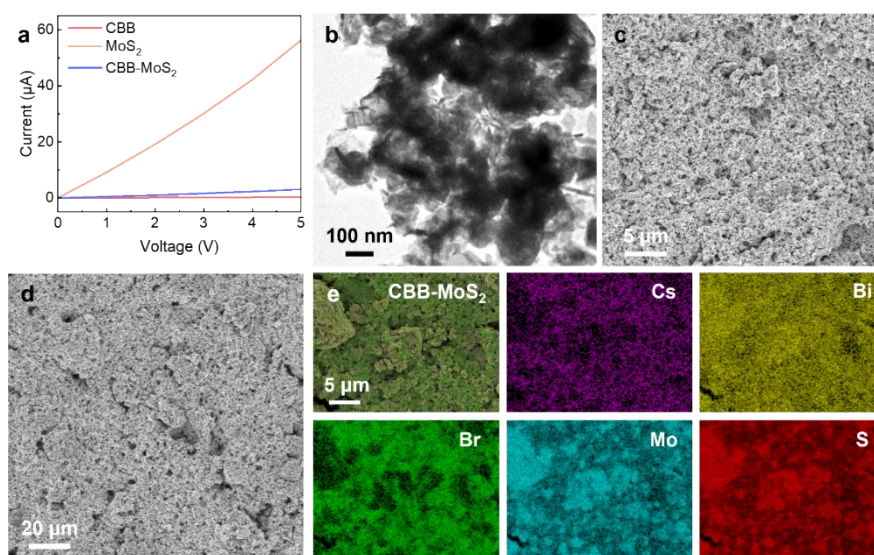

**Fig. S1** (a) I-V characteristics of pure CBB, MoS<sub>2</sub>, and CBB-MoS<sub>2</sub>. (b) TEM, (c) high magnification SEM and (d) large area SEM images of CBB-MoS<sub>2</sub> hybrid film. (e) EDS elemental mapping images of CBB-MoS<sub>2</sub> hybrid film.

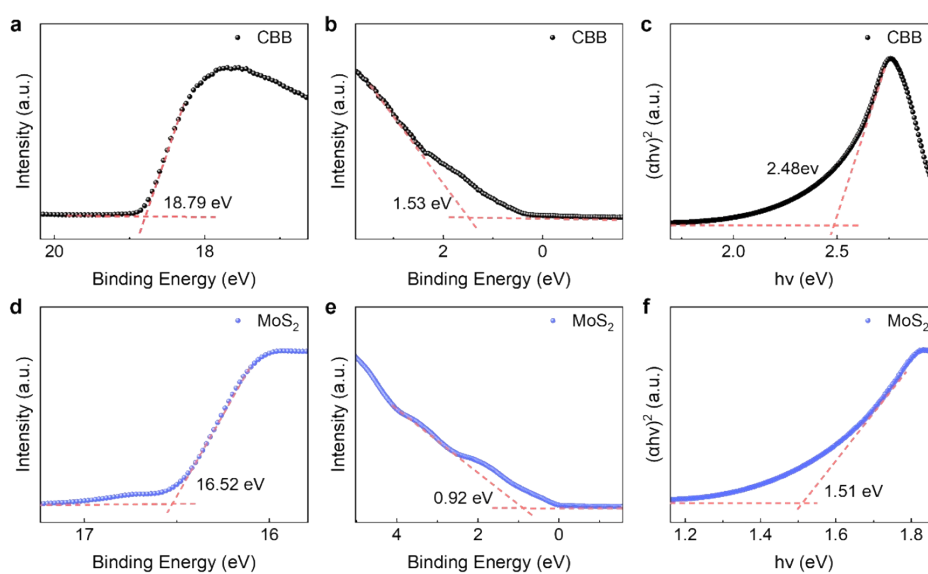

**Fig. S2** (a-b) UPS analysis of CBB. (c) Tauc plot of CBB. (d-e) UPS analysis of MoS<sub>2</sub>. (f) Tauc plot of MoS<sub>2</sub>.

According to the UPS and Tauc analysis (Fig. S2), the VBM and CBM positions of CBB and MoS<sub>2</sub> give rise to a staggered band alignment at the heterointerface, which upon light excitation, promotes photogenerated electrons and holes to preferentially transfer from CBB to MoS<sub>2</sub>.

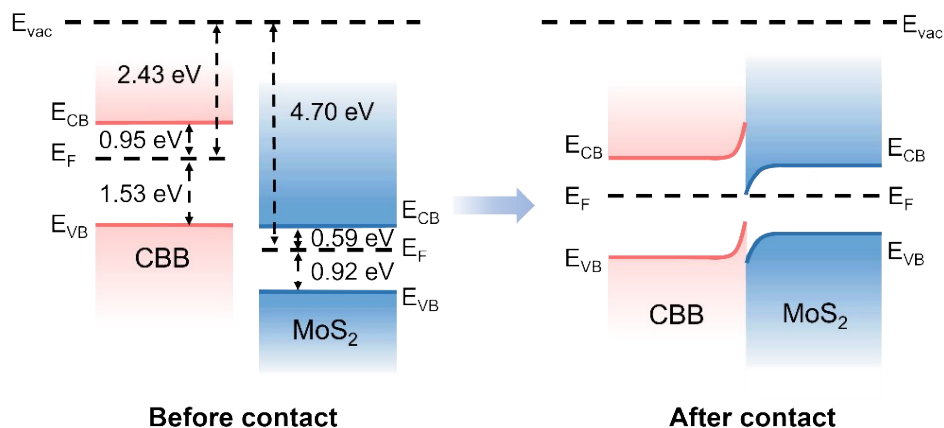

**Fig. S3** Schematic diagram of the band alignment before and after formation of CBB-MoS<sub>2</sub> heterojunction.

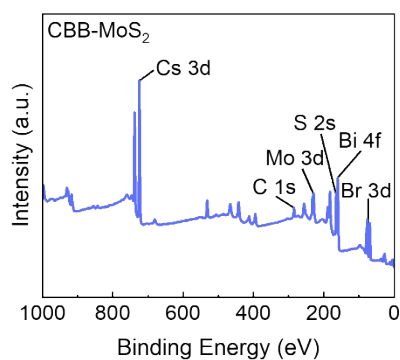

**Fig. S4** XPS survey spectrum of the CBB-MoS<sub>2</sub> hybrid.

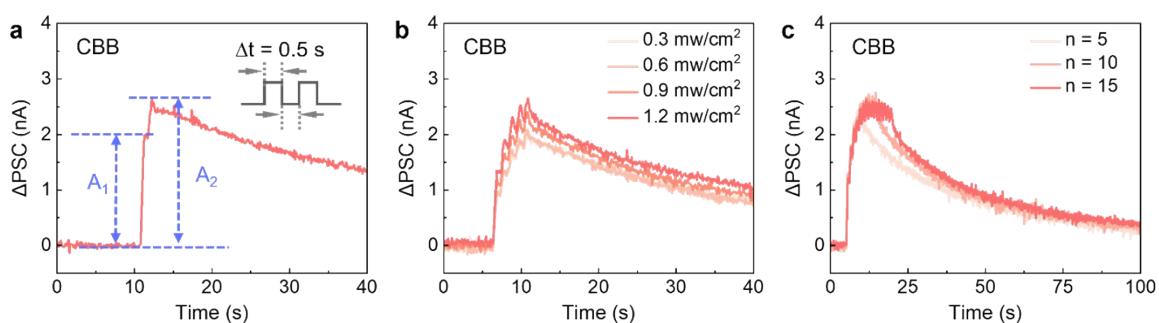

**Fig. S5** (a) The change of excitatory postsynaptic current of CBB device triggered by two consecutive optical pulses. (b) The change of excitatory postsynaptic currents of the CBB device measured under various optical powers. (c) The change of excitatory postsynaptic currents of the CBB device measured with increasing pulse numbers.

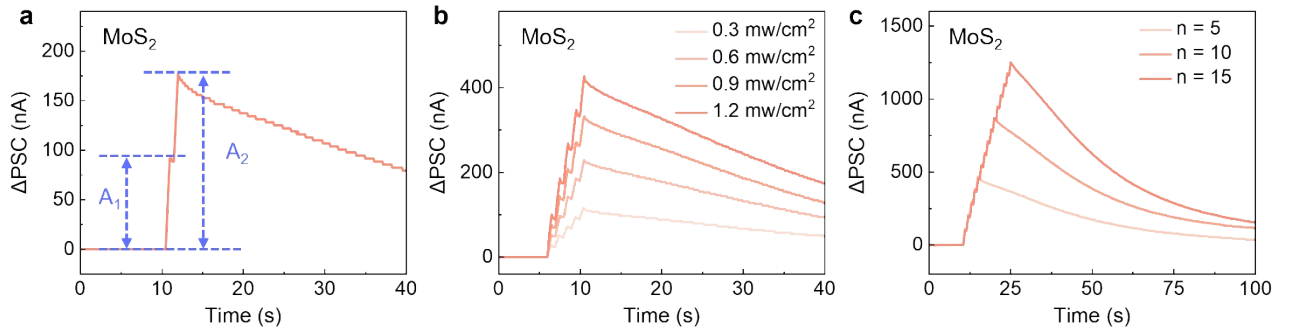

**Fig. S6** (a) The change of excitatory postsynaptic current of MoS<sub>2</sub> device triggered by two consecutive optical pulses. (b) The change of excitatory postsynaptic currents of the MoS<sub>2</sub> device measured under various optical powers. (c) The change of excitatory postsynaptic currents of the MoS<sub>2</sub> device measured with increasing pulse numbers.

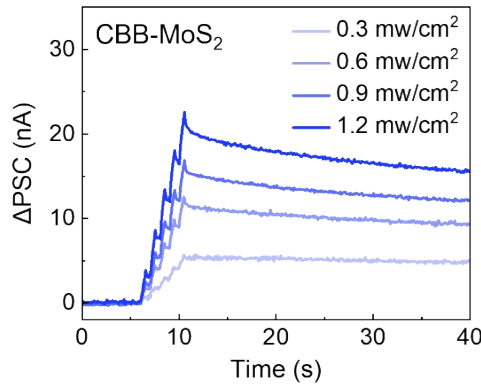

**Fig. S7** The change of excitatory postsynaptic currents of the CBB-MoS<sub>2</sub> device measured under various optical powers.

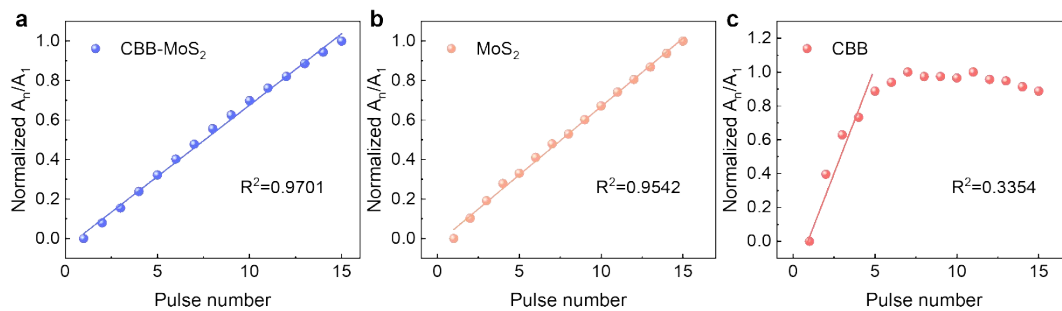

**Fig. S8** Linear fitting of the weight update ( $A_n/A_1$ ) plots of (a) CBB-MoS<sub>2</sub>, (b) MoS<sub>2</sub> and (c) CBB based devices.

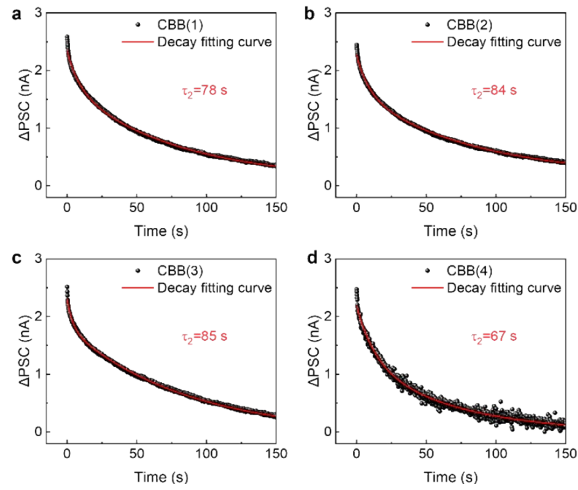

**Fig. S9** The  $\Delta$ PSC decay curves of four independent CBB devices after 15 consecutive optical pulses, along with their corresponding double-exponential fitting curves.

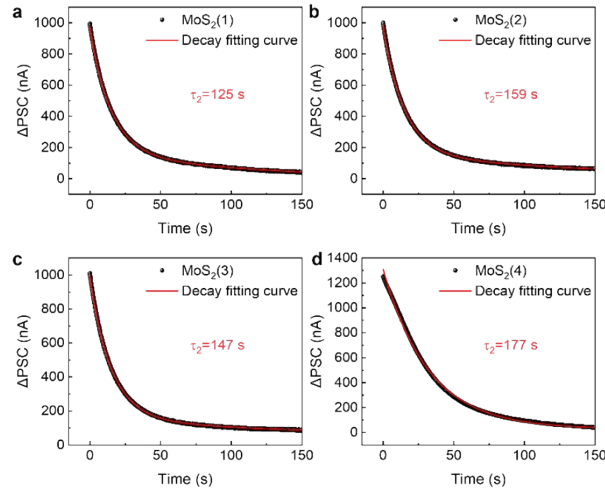

**Fig. S10** The  $\Delta$ PSC decay curves of four independent MoS<sub>2</sub> devices after 15 consecutive optical pulses, along with their corresponding double-exponential fitting curves.

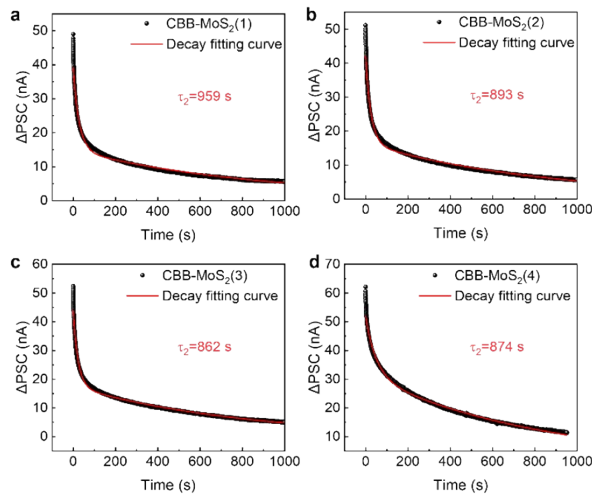

**Fig. S11** The  $\Delta$ PSC decay curves of four independent CBB-MoS<sub>2</sub> devices after 15 consecutive optical pulses, along with their corresponding double-exponential fitting curves.

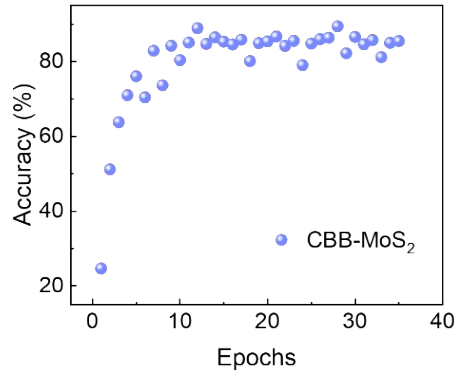

**Fig. S12** Accuracy calculation of the network based on CBB-MoS<sub>2</sub> under realistic noise conditions.

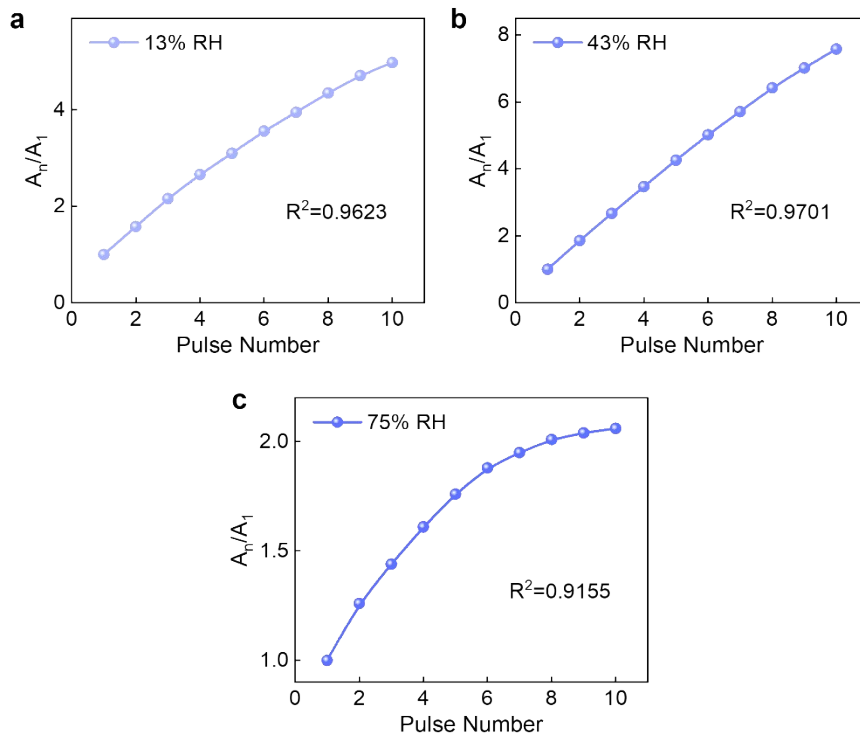

**Fig. S13** Comparison of linearity of weight update ( $A_n/A_1$ ) of the CBB-MoS<sub>2</sub> device at various relative humidity levels: (a) 13% RH, (b) 43% RH, (c) 75% RH.

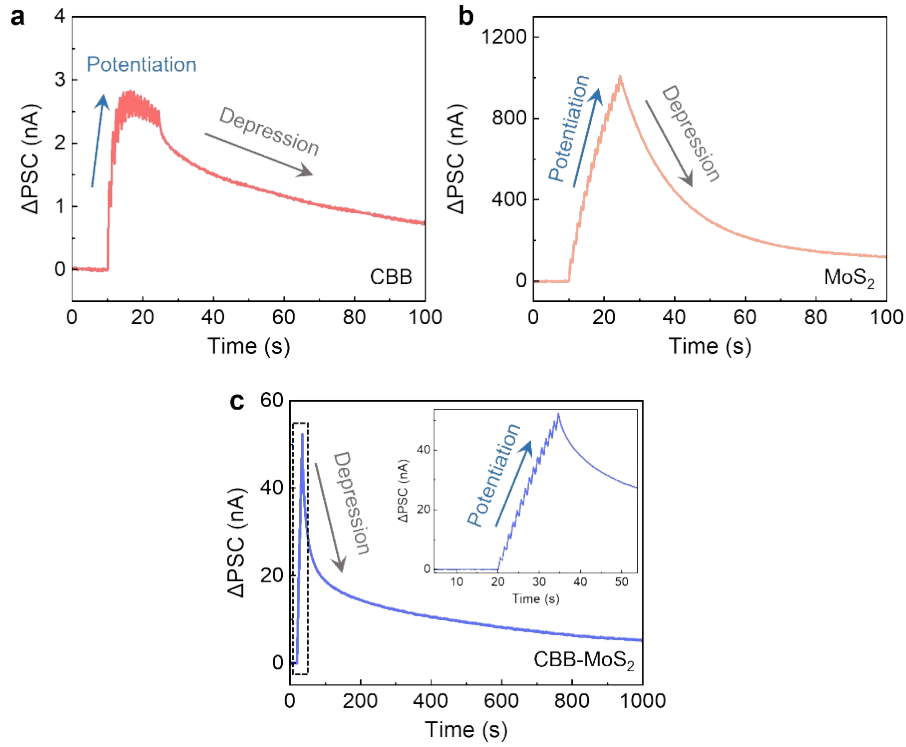

**Fig. S14** Depression behaviors of (a) CBB, (b) MoS<sub>2</sub>, and (c) CBB-MoS<sub>2</sub> based devices.

**Table S1** Comparison of PPF index and recognition accuracy of our device with previously reported three-terminal synaptic devices.

| Ref.             | Device Type         | PPF Index   | Image Recognition Accuracy |
|------------------|---------------------|-------------|----------------------------|
| <b>This work</b> | <b>Two-terminal</b> | <b>230%</b> | <b>96%</b>                 |
| 1                | Three-terminal      | 187%        | 91.4%                      |
| 2                | Three-terminal      | 160%        | 91.07%                     |
| 3                | Three-terminal      | 180%        | 92.05%                     |
| 4                | Three-terminal      | 153%        | 98.8%                      |
| 5                | Three-terminal      | 170%        | 92.88%                     |
| 6                | Three-terminal      | 172%        | 93.88%                     |

**Table S2** Symmetry factors of CBB, MoS<sub>2</sub> and CBB-MoS<sub>2</sub> based devices.

| Material        | CBB   | MoS <sub>2</sub> | CBB-MoS <sub>2</sub> |
|-----------------|-------|------------------|----------------------|
| Symmetry factor | 0.819 | 0.52             | 0.685                |

$$ANL = \frac{G_{LTP}(\frac{n}{2}) - G_{LTD}(\frac{n}{2})}{G_{max} - G_{min}}$$

Where  $G_{LTP}(n/2)$  and  $G_{LTD}(n/2)$  are the intermediate current values of LTP and LTD curves respectively,  $G_{max}$  and  $G_{min}$  are the maximum and minimum current of the device.

## References

- 1 X. Li, L. Yi, X. Yin, J. Cheng, Q. Xin and A. Song, *npj Flexible Electronics*, 2025, **9**, 57.
- 2 J. Zeng, L. Hu, Y. Pan, Z. Huang, H. Sun, J. Zeng, X. Xie and H. Chen, *Advanced Functional Materials*, 2025, **35**, 2508292.
- 3 Y. Dai, G. Chen, W. Huang, C. Xu, C. Liu, Z. Huang, T. Guo and H. Chen, *Science China Materials*, 2024, **67**, 2246-2255.
- 4 Z. Yang, S. Huo, Z. Zhang, F. Meng, B. Liu, Y. Wang, Y. Ma, Z. Wang, J. Xu, Q. Tian, Y. Wang, Y. Ding, X. Hu, Y. Xie, S. Fan, C. Pan and E. Wu, *Advanced Functional Materials*, 2025, **35**, 2509119.
- 5 R. Ci, Z. Yin, G. Miao, Y. Wang, G. Liu and F. Shan, *Journal of Materials Chemistry C*, 2025, **13**, 11207-11213.
- 6 D.-w. Cao, Y. Yan, M.-n. Wang, G.-l. Luo, J.-r. Zhao, J.-k. Zhi, C.-x. Xia and Y.-f. Liu, *Advanced Functional Materials*, 2024, **34**, 2314649.
